# Supplementary figures and images for: Universal Natural Shapes: From Unifying Shape Description to Simple Methods for Shape Analysis and Boundary Value Problems
Source: PLOS journal article supplement (doi:10.1371/journal.pone.0029324), 2012-09-27

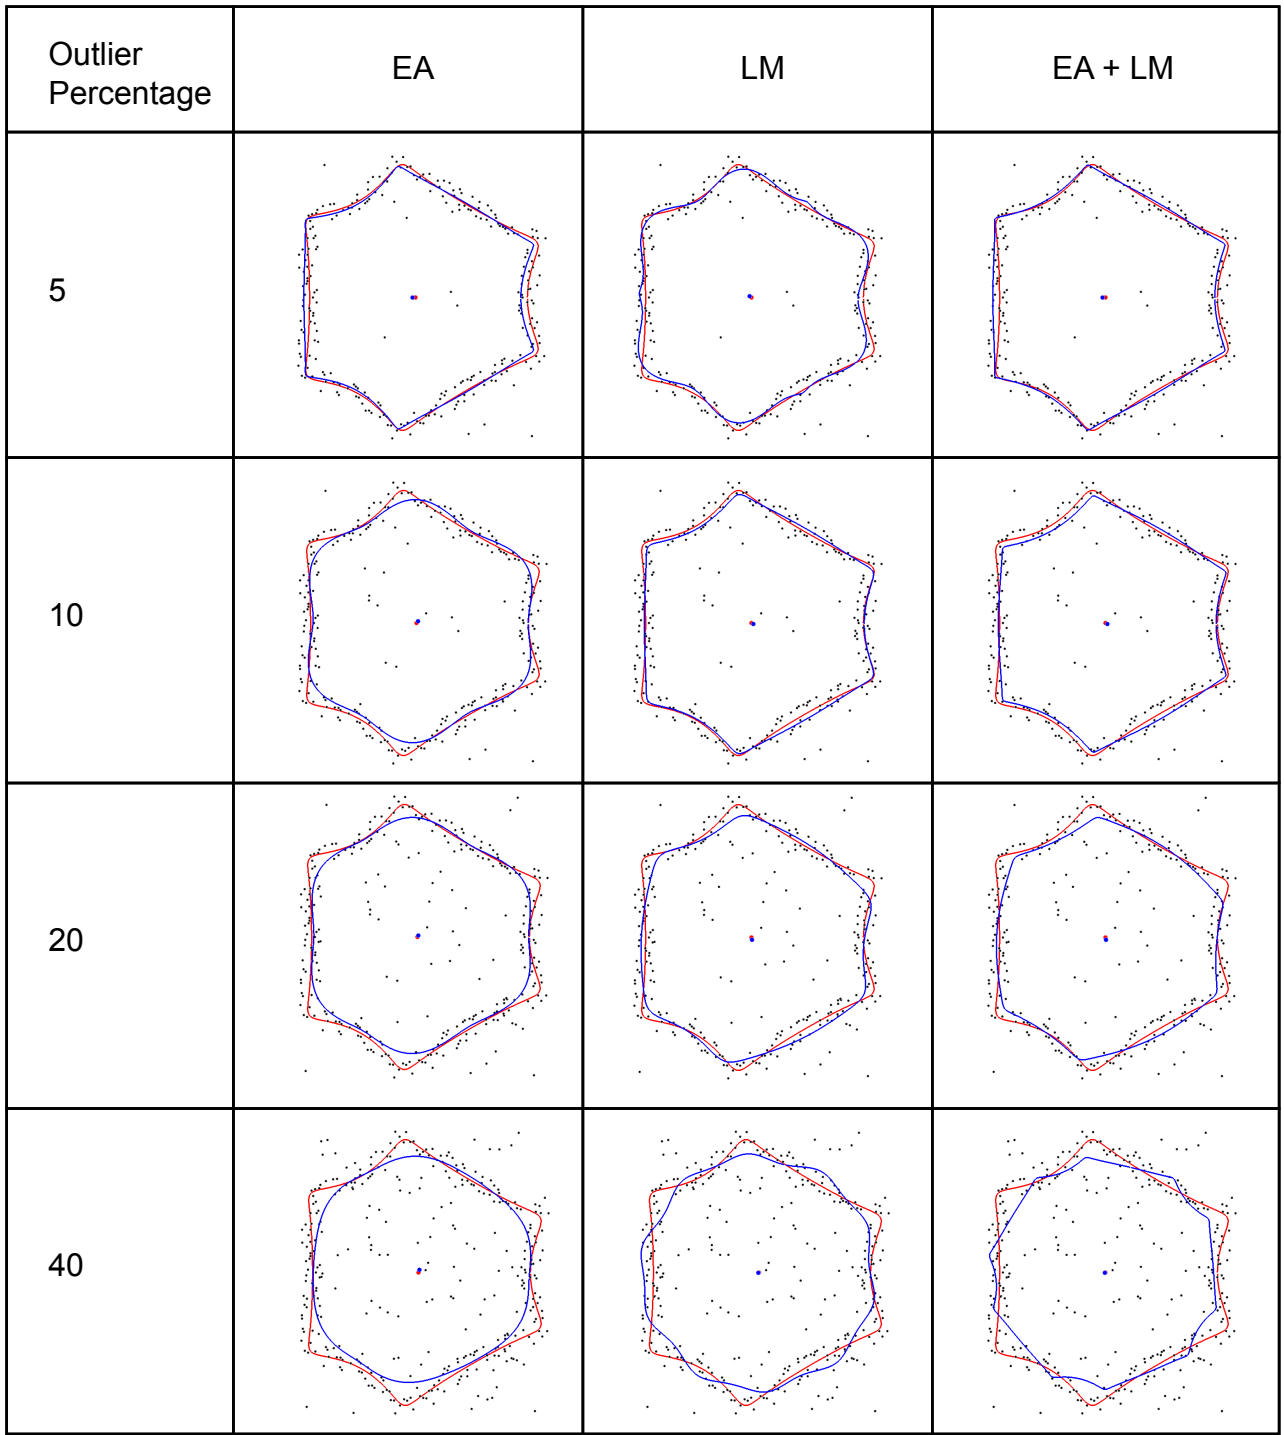

Supplement: S2 (10.1371/journal.pone.0029324.s002) [file journal.pone.0029324.s002]
